# Supplementary material for: Genomic variation and epidemiology of SARS-CoV-2 importation and early circulation in Israel
Source: PubMed Central journal article supplement (PMC7997042; doi:10.1371/journal.pone.0243265), 2021-03-26
Supplement: pone.0243265.s001.pdf [file pone.0243265.s001.pdf]

Genomic epidemiology of SARS-CoV-2 importation and early circulation in Israel  
 --Manuscript Draft--

|                                                                                                                                                                                                                                                                                                                             |                                                                                                                                                                                                                                                                                                                                                                                                                                                                                                                                                                                                                                                                                                                                                                                                                                                                                                                                                                                                                                                                                                                                                                                                                                                                                                                                                                                                                            |
|-----------------------------------------------------------------------------------------------------------------------------------------------------------------------------------------------------------------------------------------------------------------------------------------------------------------------------|----------------------------------------------------------------------------------------------------------------------------------------------------------------------------------------------------------------------------------------------------------------------------------------------------------------------------------------------------------------------------------------------------------------------------------------------------------------------------------------------------------------------------------------------------------------------------------------------------------------------------------------------------------------------------------------------------------------------------------------------------------------------------------------------------------------------------------------------------------------------------------------------------------------------------------------------------------------------------------------------------------------------------------------------------------------------------------------------------------------------------------------------------------------------------------------------------------------------------------------------------------------------------------------------------------------------------------------------------------------------------------------------------------------------------|
| <b>Manuscript Number:</b>                                                                                                                                                                                                                                                                                                   | PONE-D-20-27397                                                                                                                                                                                                                                                                                                                                                                                                                                                                                                                                                                                                                                                                                                                                                                                                                                                                                                                                                                                                                                                                                                                                                                                                                                                                                                                                                                                                            |
| <b>Article Type:</b>                                                                                                                                                                                                                                                                                                        | Research Article                                                                                                                                                                                                                                                                                                                                                                                                                                                                                                                                                                                                                                                                                                                                                                                                                                                                                                                                                                                                                                                                                                                                                                                                                                                                                                                                                                                                           |
| <b>Full Title:</b>                                                                                                                                                                                                                                                                                                          | Genomic epidemiology of SARS-CoV-2 importation and early circulation in Israel                                                                                                                                                                                                                                                                                                                                                                                                                                                                                                                                                                                                                                                                                                                                                                                                                                                                                                                                                                                                                                                                                                                                                                                                                                                                                                                                             |
| <b>Short Title:</b>                                                                                                                                                                                                                                                                                                         | SARS-CoV-2 genomic epidemiology in Israel                                                                                                                                                                                                                                                                                                                                                                                                                                                                                                                                                                                                                                                                                                                                                                                                                                                                                                                                                                                                                                                                                                                                                                                                                                                                                                                                                                                  |
| <b>Corresponding Author:</b>                                                                                                                                                                                                                                                                                                | Neta Zuckerman<br>Ministry of Health<br>Ramat Gan, Israel ISRAEL                                                                                                                                                                                                                                                                                                                                                                                                                                                                                                                                                                                                                                                                                                                                                                                                                                                                                                                                                                                                                                                                                                                                                                                                                                                                                                                                                           |
| <b>Keywords:</b>                                                                                                                                                                                                                                                                                                            | SARS-CoV-2, clades, mutations, genomic epidemiology                                                                                                                                                                                                                                                                                                                                                                                                                                                                                                                                                                                                                                                                                                                                                                                                                                                                                                                                                                                                                                                                                                                                                                                                                                                                                                                                                                        |
| <b>Abstract:</b>                                                                                                                                                                                                                                                                                                            | Severe acute respiratory disease coronavirus 2 (SARS-CoV-2) which causes corona virus disease (COVID-19) was first identified in Wuhan, China in December 2019 and has since led to a global pandemic. Importations of SARS-CoV-2 to Israel in late February from multiple countries initiated a rapid outbreak across the country. In this study, SARS-CoV-2 whole genomes were sequenced from 59 imported samples with a recorded country of importation and 101 early circulating samples in February to mid-March 2020 and analyzed to infer clades and mutational patterns with additional sequences identified Israel available in public databases. Recorded importations in February to mid-March, mostly from Europe, led to multiple transmissions in all districts in Israel. Although all SARS-CoV-2 defined clades were imported, clade 20C became the dominating clade in the circulating samples. Identification of novel, frequently altered mutated positions correlating with clade-defining positions provide data for surveillance of this evolving pandemic and spread of specific clades of this virus. SARS-CoV-2 continues to spread and mutate in Israel and across the globe. With economy and travel resuming, surveillance of clades and accumulating mutations is crucial for understanding its evolution and spread patterns and may aid in decision making concerning public health issues. |
| <b>Order of Authors:</b>                                                                                                                                                                                                                                                                                                    | Neta S Zuckerman<br>Efrat Bucris<br>Yaron Drori<br>Oran Erster<br>Danit Sofer<br>Rakefet Pando<br>Ella Mendelson<br>Orna Mor<br>Michal Mandelboim                                                                                                                                                                                                                                                                                                                                                                                                                                                                                                                                                                                                                                                                                                                                                                                                                                                                                                                                                                                                                                                                                                                                                                                                                                                                          |
| <b>Additional Information:</b>                                                                                                                                                                                                                                                                                              |                                                                                                                                                                                                                                                                                                                                                                                                                                                                                                                                                                                                                                                                                                                                                                                                                                                                                                                                                                                                                                                                                                                                                                                                                                                                                                                                                                                                                            |
| <b>Question</b>                                                                                                                                                                                                                                                                                                             | <b>Response</b>                                                                                                                                                                                                                                                                                                                                                                                                                                                                                                                                                                                                                                                                                                                                                                                                                                                                                                                                                                                                                                                                                                                                                                                                                                                                                                                                                                                                            |
| <b>Financial Disclosure</b><br><br>Enter a financial disclosure statement that describes the sources of funding for the work included in this submission. Review the <a href="#">submission guidelines</a> for detailed requirements. View published research articles from <a href="#">PLOS ONE</a> for specific examples. | The authors received no specific funding for this work                                                                                                                                                                                                                                                                                                                                                                                                                                                                                                                                                                                                                                                                                                                                                                                                                                                                                                                                                                                                                                                                                                                                                                                                                                                                                                                                                                     |

This statement is required for submission and **will appear in the published article** if the submission is accepted. Please make sure it is accurate.

#### Unfunded studies

Enter: *The author(s) received no specific funding for this work.*

#### Funded studies

Enter a statement with the following details:

- Initials of the authors who received each award
- Grant numbers awarded to each author
- The full name of each funder
- URL of each funder website
- Did the sponsors or funders play any role in the study design, data collection and analysis, decision to publish, or preparation of the manuscript?
- **NO** - Include this sentence at the end of your statement: *The funders had no role in study design, data collection and analysis, decision to publish, or preparation of the manuscript.*
- **YES** - Specify the role(s) played.

\* typeset

#### Competing Interests

Use the instructions below to enter a competing interest statement for this submission. On behalf of all authors, disclose any [competing interests](#) that could be perceived to bias this work—acknowledging all financial support and any other relevant financial or non-financial competing interests.

This statement **will appear in the published article** if the submission is accepted. Please make sure it is accurate. View published research articles from [PLOS ONE](#) for specific examples.

the authors have declared that no competing interests exist

**NO authors have competing interests**

Enter: *The authors have declared that no competing interests exist.*

**Authors with competing interests**

Enter competing interest details beginning with this statement:

*I have read the journal's policy and the authors of this manuscript have the following competing interests: [insert competing interests here]*

\* typeset

**Ethics Statement**

Enter an ethics statement for this submission. This statement is required if the study involved:

- Human participants
- Human specimens or tissue
- Vertebrate animals or cephalopods
- Vertebrate embryos or tissues
- Field research

Write "N/A" if the submission does not require an ethics statement.

General guidance is provided below. Consult the [submission guidelines](#) for detailed instructions. **Make sure that all information entered here is included in the Methods section of the manuscript.**

The study has been approved by the Sheba Medical Center Helsinki committee (#7045-20-smc). This is a retrospective study of archived samples, where sample names were anonymized; institutional Helsinki committee waived the requirement for informed consent.

**Format for specific study types**

**Human Subject Research (involving human participants and/or tissue)**

- Give the name of the institutional review board or ethics committee that approved the study
- Include the approval number and/or a statement indicating approval of this research
- Indicate the form of consent obtained (written/oral) or the reason that consent was not obtained (e.g. the data were analyzed anonymously)

**Animal Research (involving vertebrate animals, embryos or tissues)**

- Provide the name of the Institutional Animal Care and Use Committee (IACUC) or other relevant ethics board that reviewed the study protocol, and indicate whether they approved this research or granted a formal waiver of ethical approval
- Include an approval number if one was obtained
- If the study involved *non-human primates*, add *additional details* about animal welfare and steps taken to ameliorate suffering
- If anesthesia, euthanasia, or any kind of animal sacrifice is part of the study, include briefly which substances and/or methods were applied

**Field Research**

Include the following details if this study involves the collection of plant, animal, or other materials from a natural setting:

- Field permit number
- Name of the institution or relevant body that granted permission

**Data Availability**

Authors are required to make all data underlying the findings described fully available, without restriction, and from the time of publication. PLOS allows rare exceptions to address legal and ethical concerns. See the [PLOS Data Policy](#) and [FAQ](#) for detailed information.

Yes - all data are fully available without restriction

A Data Availability Statement describing where the data can be found is required at submission. Your answers to this question constitute the Data Availability Statement and **will be published in the article**, if accepted.

**Important:** Stating 'data available on request from the author' is not sufficient. If your data are only available upon request, select 'No' for the first question and explain your exceptional situation in the text box.

Do the authors confirm that all data underlying the findings described in their manuscript are fully available without restriction?

**Describe where the data may be found in full sentences. If you are copying our sample text, replace any instances of XXX with the appropriate details.**

- If the data are **held or will be held in a public repository**, include URLs, accession numbers or DOIs. If this information will only be available after acceptance, indicate this by ticking the box below. For example: *All XXX files are available from the XXX database (accession number(s) XXX, XXX).*
- If the data are all contained **within the manuscript and/or Supporting Information files**, enter the following: *All relevant data are within the manuscript and its Supporting Information files.*
- If neither of these applies but you are able to provide **details of access elsewhere**, with or without limitations, please do so. For example:

*Data cannot be shared publicly because of [XXX]. Data are available from the XXX Institutional Data Access / Ethics Committee (contact via XXX) for researchers who meet the criteria for access to confidential data.*

*The data underlying the results presented in the study are available from (include the name of the third party*

all sequences used and generated in this study are submitted and available in GISAID

*and contact information or URL).*

- This text is appropriate if the data are owned by a third party and authors do not have permission to share the data.

\* typeset

Additional data availability information:

1 **Genomic epidemiology of SARS-CoV-2 importation and early circulation in**

2 **Israel**

3 Neta S. Zuckerman<sup>1</sup>, Efrat Bucris<sup>1</sup>, Yaron Drori<sup>1,2</sup>, Oran Erster<sup>1</sup>, Danit Sofer<sup>1</sup>, Rakefet Pando<sup>1,3</sup>,  
4 Ella Mendelson<sup>1,2</sup>, Orna Mor<sup>\*1,2</sup>, Michal Mandelboim<sup>\*1,2</sup>

5

6 1 Central Virology Laboratory, Ministry of Health, Chaim Sheba Medical Center, Ramat Gan,  
7 Israel

8 2 School of Public Health, Sackler Faculty of Medicine, Tel-Aviv University, Tel-Aviv, Israel

9 3 Israel Center for Disease Control, Israel Ministry of Health, Chaim Sheba Medical Center,  
10 Ramat Gan 5265601, Israel

11 \* **equal contribution**

12

13 **Corresponding author:** Neta S. Zuckerman

14 Address: Central Virology Laboratory, Sheba Medical Center, Tel-Hashomer, 52621, Israel

15 Telephone number: +972-3-5302341

16 Email: [Neta.Zuckerman@sheba.health.gov.il](mailto:Neta.Zuckerman@sheba.health.gov.il)

17

18 **Short title:** SARS-CoV-2 genomic epidemiology in Israel

19 **Abstract**

20

21 Severe acute respiratory disease coronavirus 2 (SARS-CoV-2) which causes corona virus disease  
22 (COVID-19) was first identified in Wuhan, China in December 2019 and has since led to a global  
23 pandemic. Importations of SARS-CoV-2 to Israel in late February from multiple countries  
24 initiated a rapid outbreak across the country. In this study, SARS-CoV-2 whole genomes were  
25 sequenced from 59 imported samples with a recorded country of importation and 101 early  
26 circulating samples in February to mid-March 2020 and analyzed to infer clades and mutational  
27 patterns with additional sequences identified Israel available in public databases. Recorded  
28 importations in February to mid-March, mostly from Europe, led to multiple transmissions in all  
29 districts in Israel. Although all SARS-CoV-2 defined clades were imported, clade 20C became  
30 the dominating clade in the circulating samples. Identification of novel, frequently altered  
31 mutated positions correlating with clade-defining positions provide data for surveillance of this  
32 evolving pandemic and spread of specific clades of this virus. SARS-CoV-2 continues to spread  
33 and mutate in Israel and across the globe. With economy and travel resuming, surveillance of  
34 clades and accumulating mutations is crucial for understanding its evolution and spread patterns  
35 and may aid in decision making concerning public health issues.

36

37

38 **Keywords:** SARS-CoV-2, clades, mutations, genomic epidemiology, Israel



## 39 **Introduction**

40 Severe acute respiratory syndrome coronavirus 2 (SARS-CoV-2) was first identified in Wuhan,  
41 China in December 2019 [1] and has since rapidly spread, infecting over 20 million people  
42 worldwide to this day. SARS-CoV-2 causes corona viral disease (COVID-19) and was declared a  
43 pandemic by the world health organization on March 2020 [2]. Currently, there is no vaccine or  
44 approved effective therapeutic treatments [3].

45 Major SARS-CoV-2 clades have been characterized based on whole viral genome sequencing data,  
46 with over 80,000 sequences currently deposited from countries worldwide in the global initiative  
47 on sharing all influenza data (GISAID) database [4]. The main nomenclature systems of SARS-  
48 CoV-2 clades include Nextstrain, who name a new major clade when it reaches a frequency of 20%  
49 globally by using a year-letter genetic clade naming [5], and GISAID, who use the statistical  
50 distribution of genome distances in phylogenetic clusters and name the clades by the actual letters  
51 of the defining marker mutations of each cluster [4]. According to Nextstrain's nomenclature  
52 system [5], five globally circulating SARS-CoV-2 clades are currently defined – 19A (the root  
53 clade) and 19B, that originated in Asia and are still widespread there, and clades 20A, B and C now  
54 dominate global infections and are widespread in Europe [6][7]. The 20 clades (G clades by  
55 GISAID nomenclature) have emerged in Europe in mid-January, and bear the D614G mutation  
56 (refers to the mutation in the amino acid sequence; A23403G refers to the nucleotide sequence) in  
57 the spike protein which bind the human ACE2 receptor [8]. This mutation has recently been  
58 associated with high viral loads and increased infectivity but not with patient hospitalization status  
59 [6], although recent reports argue that this variant is related to COVID-19 mortality [9][10].  
60 Additional mutations within the SARS-CoV-2 genome are being monitored as potential emerging-  
61 clades (e.g. C18877T emerging from clade 20, C13730T emerging from clade 19) via Nextstrain's

62 global genomic epidemiology analysis [5] and may become a major clade once they reach sufficient  
63 global frequency/spread.

64 SARS-CoV-2 started to spread in Israel in late February through early March 2020, where multiple  
65 importation events of SARS-CoV-2 into Israel from countries worldwide initiated a rapid outbreak  
66 across the country with >88,000 infected individuals and ~700 deaths by August 2020. Prompted  
67 by recent escalations in the daily number of infected individuals in Israel, in this study we  
68 sequenced 160 SARS-CoV-2 complete genomes from imported and early circulating samples.  
69 Along epidemiological data including country of importation and district of residence and  
70 additional Israel-based sequences from the same time frame available in GISAID, we thoroughly  
71 investigated mutation patterns to characterize the origins of viral evolution and spread patterns of  
72 SARS-CoV-2 in Israel.

73

## 74 **Materials and Methods**

### 75 **Sample collection, nucleic acid extraction and viral genome quantification by real-time**

#### 76 **PCR (q-PCR)**

77 Starting with the first imported cases into Israel in February and until mid-March 2020, all  
78 individuals entering **Israel suspected to have contracted SARS-CoV-2 were exclusively**  
79 **diagnosed in Israel's Central Virology Laboratory (ICVL)** via real-time PCR. Viral genomes  
80 were extracted from 200  $\mu$ L respiratory samples with the MagNA PURE 96 (Roche, Mannheim,  
81 Germany), according to the manufacturer instructions and qRT-PCR reactions using primers  
82 corresponding to the SARS-CoV-2 envelope (E) gene were performed as previously described  
83 [11]. All samples were tested for the human RNaseP gene, which served as a housekeeping gene.  
84 **The Quantitative** reverse transcription PCR (qRT-PCR) reactions were performed in 25  $\mu$ L

85 Ambion Ag-Path Master Mix (Life Technologies, Carlsbad, CA, USA) using TaqMan Chemistry  
86 on the ABI 7500 instrument. Nucleic extraction samples from SARS-CoV-2 positive samples  
87 were taken for further molecular analysis.

88 **Ethics statement:** The study has been approved by the Sheba Medical Center Helsinki  
89 committee. This is a retrospective study of archived samples, where sample names were  
90 anonymized; institutional Helsinki committee waived the requirement for informed consent.

91

### 92 **Specific amplification of SARS-CoV-2 from clinical samples**

93 RNA in extracted nucleic acids was reverse transcribed to single strand cDNA using SuperScript  
94 IV (ThermoFisher Scientific, Waltham, MA, USA) as per manufacturer's instructions. SARS-  
95 CoV-2 specific primers designed to capture SARS-CoV-2 whole genome (version 1—total 218  
96 primers, divided into two primer pools designed by Josh Quick from ARTIC Network) were used  
97 to generate double strand cDNA and amplify it via PCR using Q5 Hot Start DNA Polymerase  
98 (NEB) [12]. Briefly, each sample underwent two PCR reactions with primer pool 1 or 2 and 5X  
99 Q5 reaction buffer, 19 mM dNTPs and nuclease-free water. Resulting DNA was combined and  
100 quantified with Qubit dsDNA BR Assay kit (ThermoFisher Scientific) as per manufacturer's  
101 instructions and 1ng of amplicon DNA in 5  $\mu$ L per sample was taken into library preparation.

102

### 103 **Library preparation and sequencing**

104 Libraries were prepared using NexteraXT library preparation kit and NexteraXT index kit V2 as  
105 per manufacturer's instructions (Illumina, San Diego, CA, USA). Libraries were purified with  
106 AMPure XP magnetic beads (Beckman Coulter, Brea, CA, USA) and library concentration was  
107 measured by Qubit dsDNA HS Assay kit (Thermo Fisher Scientific, Waltham, MA, USA).

108 Library validation and mean fragment size was determined by TapeStation 4200 via DNA HS

109 D1000 kit (Agilent, Santa Clara, CA, USA). The mean fragment size was ~400 bp, as expected.  
110 The library mean fragment size and concentration molarity was calculated and each library was  
111 diluted to 4 nM. Libraries were pooled, denatured and diluted to 10pM and sequenced on MiSeq  
112 with V3 2X300 bp run kit (Illumina). Sequences are available in GISAID.

113

#### 114 **Bioinformatics analyses**

115 Fastq files were subjected to quality control using FastQC ([www.bioinformatics.babraham.ac.uk/](http://www.bioinformatics.babraham.ac.uk/projects/fastqc/)  
116 [projects/fastqc/](http://www.bioinformatics.babraham.ac.uk/projects/fastqc/)) and MultiQC [13] and low-quality sequences were filtered using trimmomatic  
117 [14]. To obtain a consensus sequence per sample, paired-end fastq files were combined for each  
118 sample via Unix cat command. SARS-CoV-2 reference genome was downloaded from the  
119 national center for biotechnology information (NCBI) (NC\_045512.2) and indexed using  
120 Burrows-Wheeler aligner (BWA) [15]. Combined fastq files were mapped to the indexed  
121 reference genome using BWA mem [15]. SAMtools suite [16] was used to convert sam to bam  
122 files, remove duplicates and filter unmapped reads. Bam files were sorted, indexed and subjected  
123 to quality control using SAMtools suite. Coverage and depth of sequencing was calculated from  
124 sorted bam files using a custom python script. A consensus sequence was constructed for each  
125 sample using SAMtools mpileup and bcf tools [17] and converted to a fasta file using seqtk  
126 (<https://github.com/lh3/seqtk>). Resulting consensus sequences were further analyzed together  
127 with additional sequences identified in Israel from late March to late April (n=211) available in  
128 GISAID [4]. Using Augur pipeline [5], sequences were aligned to SARS-CoV-2 reference  
129 genome (NC\_045512.2) using MAFFT [18], and a time-resolved phylogenetic tree was  
130 constructed with IQ-Tree [19] and TreeTime [20] under the GTR substitution model and  
131 visualized with auspice [5]. Clade nomenclature was attained from Nextstrain [5].

132 Additional bioinformatic analyses such as translation from nucleotide to amino acid sequences,  
133 comparison of differences across sequences and sample clustering were carried out using R and  
134 Bioconductor packages Seqinr [21], HDMD (<https://CRAN.R-project.org/package=HDMD>) and  
135 ggplot2 [22]. Classification to amino acid groups was set according to physiochemical attributes  
136 determined by Atchley et al. [23].

137

## 138 **Results**

### 139 **SARS-CoV-2 genomic epidemiology of imported and early circulating viruses**

140 On February 21, 2020, two Israeli citizens infected with SARS-CoV-2 from the Diamond  
141 Princess cruise ship anchoring in Japan were brought to designated SARS-CoV-2 quarantine  
142 facilities in Israel. The first non-controlled imported case of SARS-CoV-2 into Israel from  
143 Europe (Italy) was diagnosed in February 27, 2020, followed by additional importations, mostly  
144 from other European countries but also from countries worldwide until early March, when air  
145 traffic was largely suspended. At that time, SARS-CoV-2 suspected individuals were exclusively  
146 diagnosed by the central virology laboratory, such that all epidemiologically-verified  
147 importations were recorded and samples were retained. Here, we sequenced complete SARS-  
148 CoV-2 genomes from all imported cases identified in late February to mid-March (n=59) and  
149 from circulating viruses from individuals diagnosed between mid-March and April (n=101) using  
150 SARS-CoV-2 whole genome capture (ARTIC network V3 primers, <https://artic.network/ncov->  
151 2019) and next generation sequencing (Illumina). Results were analyzed together with additional  
152 sequences identified in Israel from late March to late April (n=211) available in GISAID [4].  
153 Sequences were aligned to SARS-CoV-2 reference genome (NC\_045512.2) using MAFFT [18].  
154 A time-resolved phylogenetic tree was constructed using the augur toolchain [5], utilizing IQ-

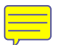

155 Tree [19] with the GTR substitution model, TreeTime [20] and visualized with auspice [5].  
156 Additional mutation analyses were carried out using R and Bioconductor.  
157 The phylogenetic tree, depicting imported and circulating cases, shows that importation events  
158 from Europe, United States, Asia and Africa (Egypt) in late February to mid-March led to  
159 multiple transmission chains in Israel (Figure 1A). All districts in Israel were affected, with the  
160 highest number of importations occurring into the Central and Tel-Aviv districts (Figure 1B).

161

### 162 **SARS-CoV-2 imported and circulating clades**

163 To define imported and circulating clades in Israel, we applied the Nextstrain nomenclature  
164 (<https://github.com/nextstrain/ncov/blob/master/defaults/clades.tsv>), that includes the originating  
165 clade 19A and its derivation 19B, and the emerging clades 20 and its derivations 20B and 20C  
166 with the spike mutation D614G [6] that had widely spread in Europe since mid-February [5]. All  
167 five clades were imported into Israel during late February to mid-March (Figure 2A, n=59).  
168 Clades 19A and 19B constituted 40% of the clades imported into Israel with relatively equal  
169 representation (~20% each). Clade 19A included the two Diamond Princess samples imported  
170 from Japan, and clade 19B was almost exclusively imported from Spain (11/12 of 19B  
171 importations) (Figure 2B). Clade 20 constituted 60% of imported cases and included the first  
172 importation from Italy (clade 20B) (Figure 2B). Clade 20C, which was equally represented as  
173 clades 20A and 20B in the imported population became the dominant circulating clade in Israel  
174 (51%), whereas clade 19B diminished in the circulating population (Figure 2C). Within Israel,  
175 the Jerusalem and Tel Aviv districts had the highest SARS-CoV-2 incidence and the Haifa  
176 district the lowest during the early spread. Clade 20, specifically 20C, was the dominant clade in  
177 most districts (Figure 2C).

178

179 **SARS-CoV-2 mutation patterns**

180 To further explore patterns in viral evolution, we identified positions along the SARS-CoV-2  
181 genome that were frequently altered across the Israeli sequences compared to the reference  
182 genome. Correlations of these positions revealed novel positions that were altered in the Israeli  
183 sequences, in addition to the known clade-defining positions (Figure 3A). The novel positions  
184 were associated with defined clades via Nextstrain auspice visualization tool [5]. Clusters of  
185 positive correlations were observed between mutated positions within each of the 19 and 20  
186 clades, whereas negative correlations were observed between mutated positions associated with  
187 clades 19 and positions in clade 20, suggesting distinct linkage of these positions to either clade.  
188 Interestingly, negative correlations were observed between the clade 20B mutated positions (313,  
189 28881, 28882, 28883) and some of the positions in clades A/C (e.g. 1059, 25563, 11916), which  
190 may hint that the clade B positions are strongly linked to one another (Figure 3A). Visualization  
191 with Nextstrain global analysis (<https://nextstrain.org/ncov/global>) showed that these mutated  
192 positions are not specifically unique to Israel and were observed in several SARS-CoV-2 genome  
193 sequences worldwide. To assess the impact of all these alterations, the resultant amino acid (AA)  
194 substitutions were classified into silent (S) or replacement (R), and in the latter case, the change  
195 in the physiochemical attributes of the AA (classified by Atchley [23]) was also assessed. R  
196 mutations were observed in higher frequency (20/29 mutations) compared to S (9/29), most of  
197 which led to a change in the AA attribute group (12/20 R mutations). Many of the AA group  
198 exchanges involved a change between the aliphatic (non-polar, hydrophobic) and hydroxylated  
199 (polar, uncharged) AA groups. Finally, over half of the mutations observed (15/29) were C-to-T,  
200 suggesting viral restriction by host APOBEC mechanism in these positions, as previously  
201 observed [24].

202

## 203 **Discussion**

204 Since its first importation into Israel late February 2020, SARS-CoV-2 had expeditiously spread  
205 in Israel. The first importations occurred from Japan and Europe (Italy), however the spread in  
206 the population is more likely to have been initiated by first importations from Europe, as the  
207 importations from Japan (Diamond Princess passengers) were planned and controlled in  
208 specialized treatment facilities. Sequencing and analyses of SARS-CoV-2 complete genomes  
209 from imported and circulating samples revealed that although several clades were initially  
210 imported into Israel in late February to mid-March, clade 20 quickly became dominant, similar to  
211 observations across Europe. Clade 20 (including 20A, B and C), also known as clade G by  
212 GISAID nomenclature [4], is an emerging clade that has gained prominence in Europe in early  
213 March followed by expansion into North America and Asia, where its hallmark mutation,  
214 D614G (a23403g in the nucleotide sequence), has been recently shown to increase infectivity [6].  
215 Specifically, clade 20C, a dominant clade in North America [5] that was observed in 51% of  
216 circulating samples in Israel, may have been reinforced in gaining prominence in Israel by  
217 additional importations from the United States in late March, in addition to its naturally higher  
218 infectivity compared to clade 19.

219 Frequently mutated positions were identified in the Israeli samples, some of which correlated  
220 with known clade-defining mutations and observed also in sequences worldwide. Most of these  
221 mutations were R mutations that caused a change in the AA attribute group, which have a greater  
222 chance to affect the protein. It is important to closely observe the emerging mutated positions  
223 throughout this continuous pandemic as some may gain evolutionary advantage and affect larger  
224 portions of the population. This might have an impact on the specificity of diagnostic tests such  
225 as real time PCR and even vaccine design targeting these positions.



226 SARS-CoV-2 is still spreading in Israel and across the globe. Surveillance of SARS-CoV-2  
227 genomes is crucial for understanding its evolution and spread patterns and may aid in decision  
228 making concerning public health issues.

229

230

231 **Acknowledgments:** none

232 **Figure legends**

233

234 **Figure 1. SARS-CoV-2 genomic epidemiology of samples imported and circulating in Israel.**

235 (A) time-resolved phylogenetic tree representing 372 imported and early circulating samples  
236 sequenced in Israel. Samples are colored according to their origin: Israel circulating samples in  
237 yellow, and imported samples from Europe, USA, Asia (China-reference sequence, Japan) and  
238 Africa (Egypt) in red, green, blue and purple, respectively. SARS-CoV-2 clades are noted by  
239 each relevant branch. (B) Distribution of imported and circulating samples across districts in  
240 Israel.

241

242 **Figure 2. SARS-CoV-2 imported and circulating clades.**

243 (A) Distribution of SARS-CoV-2 clades from first diagnosed sample in late February through  
244 early circulation in Israel. (B) Distribution and frequency of clades in imported samples in late  
245 February to mid-March, by country of origin. (C) Distribution and frequency of clades in early  
246 circulating samples (mid-March to late April), by district.

247

248 **Figure 3. SARS-CoV-2 frequently observed mutations.**

249 29 mutations along the SARS-CoV-2 genome occurred in >2% of the 372 Israeli sequences. (A)  
250 Correlation table of the frequently observed mutations. Positive/negative correlations are denoted  
251 in blue/red respectively. Known clade-defining mutations are underlined and clade association is  
252 noted. (B) Listed for each frequently observed mutation its position, gene, % frequency in Israeli  
253 sequences, nucleotide substitution, whether it's an R or S mutation, and in case of an R mutation,  
254 the originating and altered AA group. Known clade-defining mutations are highlighted in grey.

255 **References**

- 256 [1] N. Zhu *et al.*, “A Novel Coronavirus from Patients with Pneumonia in China, 2019,” *N.*  
257 *Engl. J. Med.*, vol. 382, no. 8, pp. 727–733, Feb. 2020, doi: 10.1056/NEJMoa2001017.
- 258 [2] “WHO Director-General’s opening remarks at the media briefing on COVID-19 - 11 March  
259 2020.” [who.int/dg/speeches/detail/who-director-general-s-opening-remarks-at-the-](https://www.who.int/dg/speeches/detail/who-director-general-s-opening-remarks-at-the-media-briefing-on-covid-19---11-march-2020)  
260 [media-briefing-on-covid-19---11-march-2020](https://www.who.int/dg/speeches/detail/who-director-general-s-opening-remarks-at-the-media-briefing-on-covid-19---11-march-2020) (accessed Aug. 15, 2020).
- 261 [3] C. Wang, P. W. Horby, F. G. Hayden, and G. F. Gao, “A novel coronavirus outbreak of  
262 global health concern,” *Lancet*, vol. 395, no. 10223, pp. 470–473, Feb. 2020, doi:  
263 10.1016/S0140-6736(20)30185-9.
- 264 [4] S. Elbe and G. Buckland-Merrett, “Data, disease and diplomacy: GISAID’s innovative  
265 contribution to global health,” *Glob. Challenges*, vol. 1, no. 1, pp. 33–46, Jan. 2017, doi:  
266 10.1002/gch2.1018.
- 267 [5] J. Hadfield *et al.*, “Nextstrain: real-time tracking of pathogen evolution,” *Bioinformatics*,  
268 vol. 34, no. 23, pp. 4121–4123, Dec. 2018, doi: 10.1093/bioinformatics/bty407.
- 269 [6] B. Korber *et al.*, “Tracking Changes in SARS-CoV-2 Spike: Evidence that D614G Increases  
270 Infectivity of the COVID-19 Virus,” *Cell*, Jul. 2020, doi: 10.1016/j.cell.2020.06.043.
- 271 [7] E. Alm *et al.*, “Geographical and temporal distribution of SARS-CoV-2 clades in the WHO  
272 European Region, January to June 2020,” *Eurosurveillance*, vol. 25, no. 32, Aug. 2020, doi:  
273 10.2807/1560-7917.ES.2020.25.32.2001410.
- 274 [8] J. Lan *et al.*, “Structure of the SARS-CoV-2 spike receptor-binding domain bound to the  
275 ACE2 receptor.,” *Nature*, vol. 581, no. 7807, pp. 215–220, 2020, doi: 10.1038/s41586-  
276 020-2180-5.

- 277 [9] Y. Toyoshima, K. Nemoto, S. Matsumoto, Y. Nakamura, and K. Kiyotani, "SARS-CoV-2  
278 genomic variations associated with mortality rate of COVID-19," *J. Hum. Genet.*, Jul. 2020,  
279 doi: 10.1038/s10038-020-0808-9.
- 280 [10] M. Becerra-Flores and T. Cardozo, "SARS-CoV-2 viral spike G614 mutation exhibits higher  
281 case fatality rate," *Int. J. Clin. Pract.*, vol. 74, no. 8, Aug. 2020, doi: 10.1111/ijcp.13525.
- 282 [11] V. M. Corman *et al.*, "Detection of 2019 novel coronavirus (2019-nCoV) by real-time RT-  
283 PCR," *Euro Surveill.*, vol. 25, no. 3, 2020, doi: 10.2807/1560-7917.ES.2020.25.3.2000045.
- 284 [12] "Artic network, SARS-CoV-2." <https://artic.network/ncov-2019> (accessed Aug. 15, 2020).
- 285 [13] P. Ewels, M. Magnusson, S. Lundin, and M. Källér, "MultiQC: Summarize analysis results  
286 for multiple tools and samples in a single report," *Bioinformatics*, vol. 32, no. 19, pp.  
287 3047–3048, 2016, doi: 10.1093/bioinformatics/btw354.
- 288 [14] A. M. Bolger, M. Lohse, and B. Usadel, "Trimmomatic: a flexible trimmer for Illumina  
289 sequence data.," *Bioinformatics*, vol. 30, no. 15, pp. 2114–20, Aug. 2014, doi:  
290 10.1093/bioinformatics/btu170.
- 291 [15] H. Li, "Aligning sequence reads, clone sequences and assembly contigs with BWA-MEM,"  
292 Mar. 2013, [Online]. Available: <http://arxiv.org/abs/1303.3997>.
- 293 [16] H. Li *et al.*, "The Sequence Alignment/Map format and SAMtools.," *Bioinformatics*, vol.  
294 25, no. 16, pp. 2078–9, Aug. 2009, doi: 10.1093/bioinformatics/btp352.
- 295 [17] V. Narasimhan, P. Danecek, A. Scally, Y. Xue, C. Tyler-Smith, and R. Durbin,  
296 "BCFtools/RoH: A hidden Markov model approach for detecting autozygosity from next-  
297 generation sequencing data," *Bioinformatics*, vol. 32, no. 11, pp. 1749–1751, 2016, doi:  
298 10.1093/bioinformatics/btw044.

- 299 [18] K. Katoh, "MAFFT: a novel method for rapid multiple sequence alignment based on fast  
300 Fourier transform," *Nucleic Acids Res.*, vol. 30, no. 14, pp. 3059–3066, Jul. 2002, doi:  
301 10.1093/nar/gkf436.
- 302 [19] L.-T. Nguyen, H. A. Schmidt, A. von Haeseler, and B. Q. Minh, "IQ-TREE: a fast and  
303 effective stochastic algorithm for estimating maximum-likelihood phylogenies," *Mol.*  
304 *Biol. Evol.*, vol. 32, no. 1, pp. 268–74, Jan. 2015, doi: 10.1093/molbev/msu300.
- 305 [20] P. Sagulenko, V. Puller, and R. A. Neher, "TreeTime: Maximum-likelihood phylodynamic  
306 analysis," *Virus Evol.*, vol. 4, no. 1, Jan. 2018, doi: 10.1093/ve/vex042.
- 307 [21] C. Delphine and L. Jean R., "SeqinR 1.0-2: A Contributed Package to the R Project for  
308 Statistical Computing Devoted to Biological Sequences Retrieval and Analysis," in  
309 *Structural Approaches to Sequence Evolution*, Springer: Berlin/Heidelberg, Germany,  
310 2007, pp. 207–232.
- 311 [22] H. Wickham, *ggplot2: Elegant Graphics for Data Analysis*. Springer-Verlag New York,  
312 2016.
- 313 [23] W. R. Atchley, W. Terhalle, and A. Dress, "Positional Dependence, Cliques, and Predictive  
314 Motifs in the bHLH Protein Domain," *J. Mol. Evol.*, vol. 48, no. 5, pp. 501–516, May 1999,  
315 doi: 10.1007/PL00006494.
- 316 [24] S. Di Giorgio, F. Martignano, M. G. Torcia, G. Mattiuz, and S. G. Conticello, "Evidence for  
317 host-dependent RNA editing in the transcriptome of SARS-CoV-2," *Sci. Adv.*, vol. 6, no. 25,  
318 p. eabb5813, Jun. 2020, doi: 10.1126/sciadv.abb5813.
- 319

A

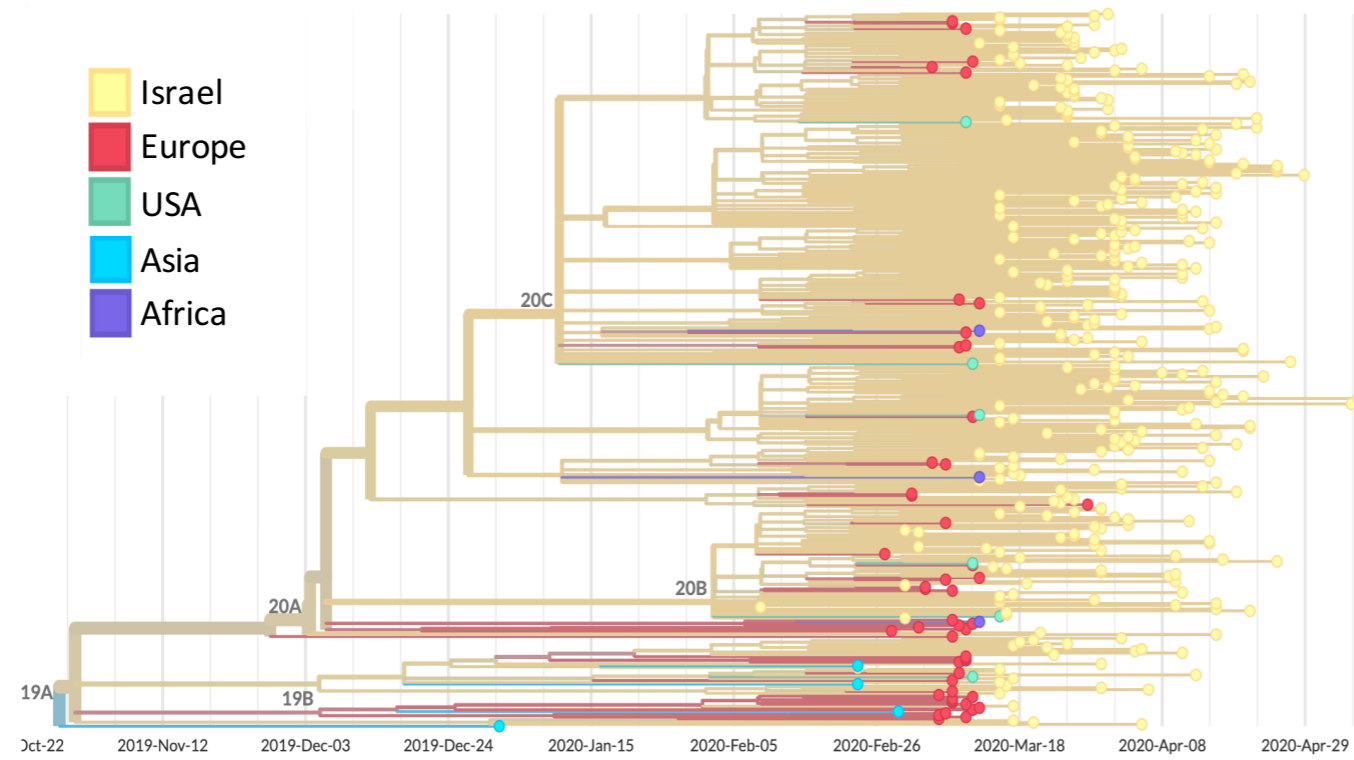

B

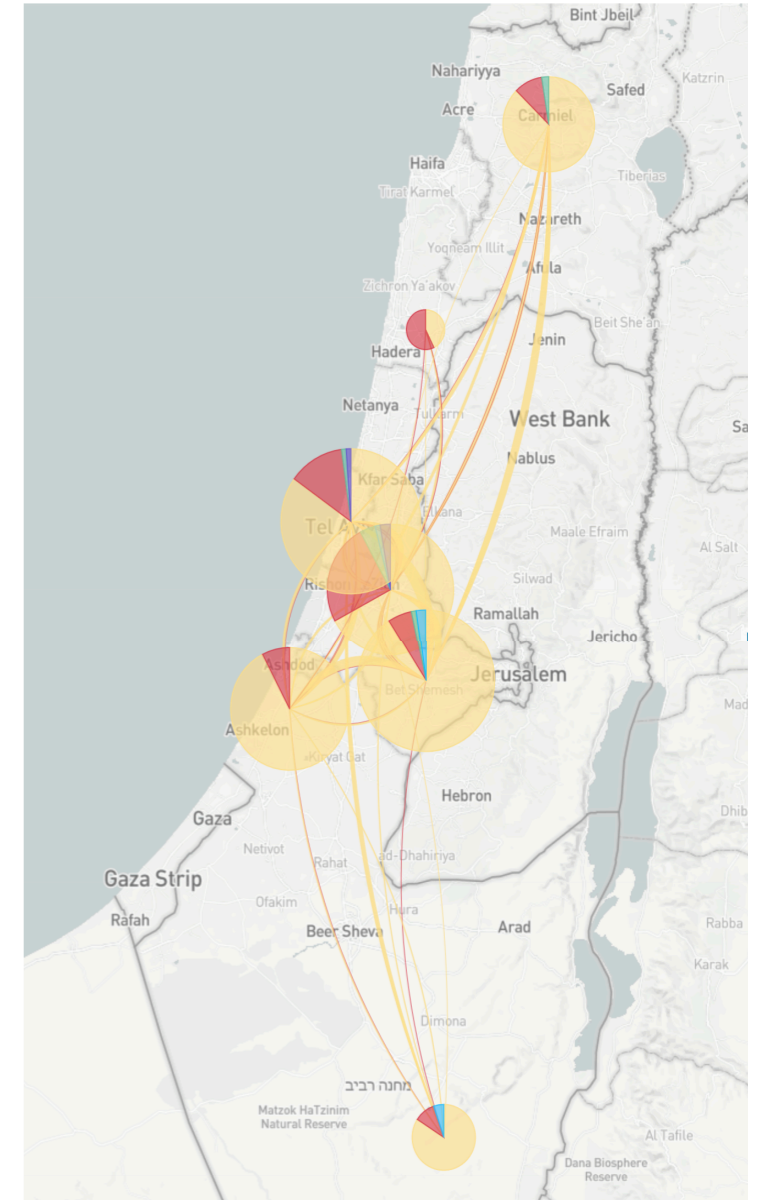

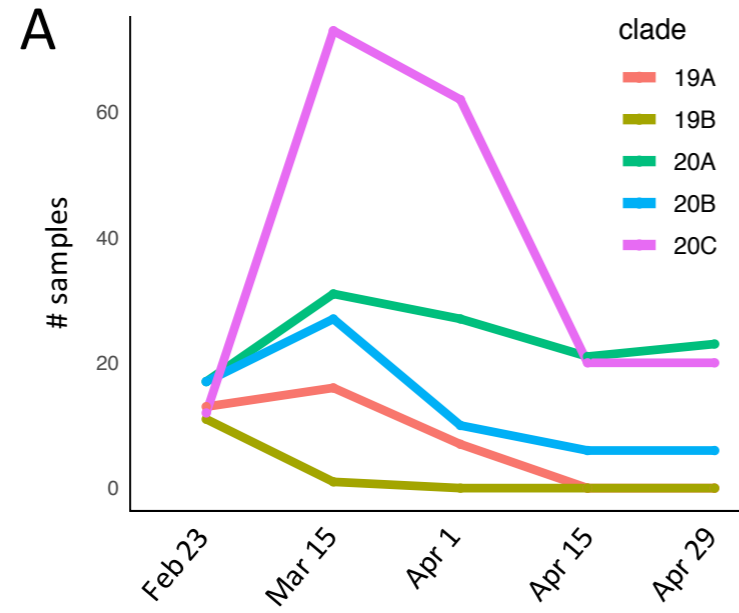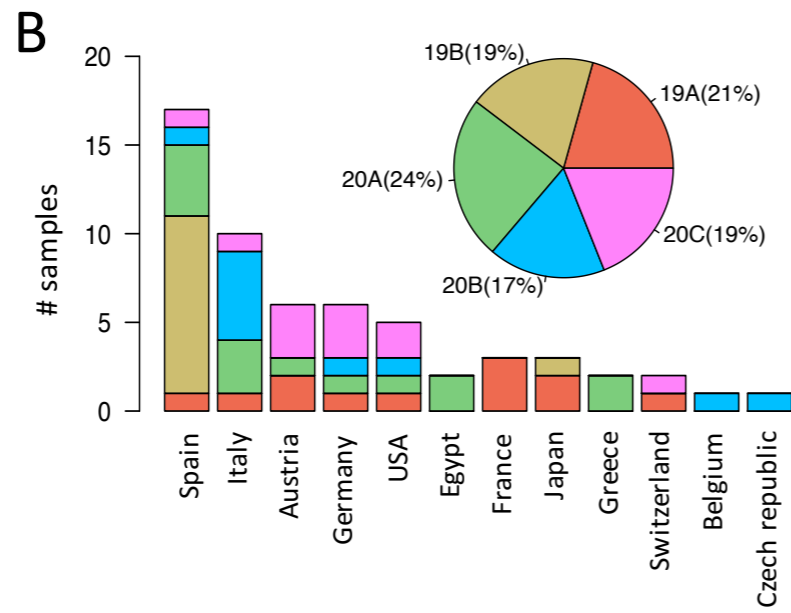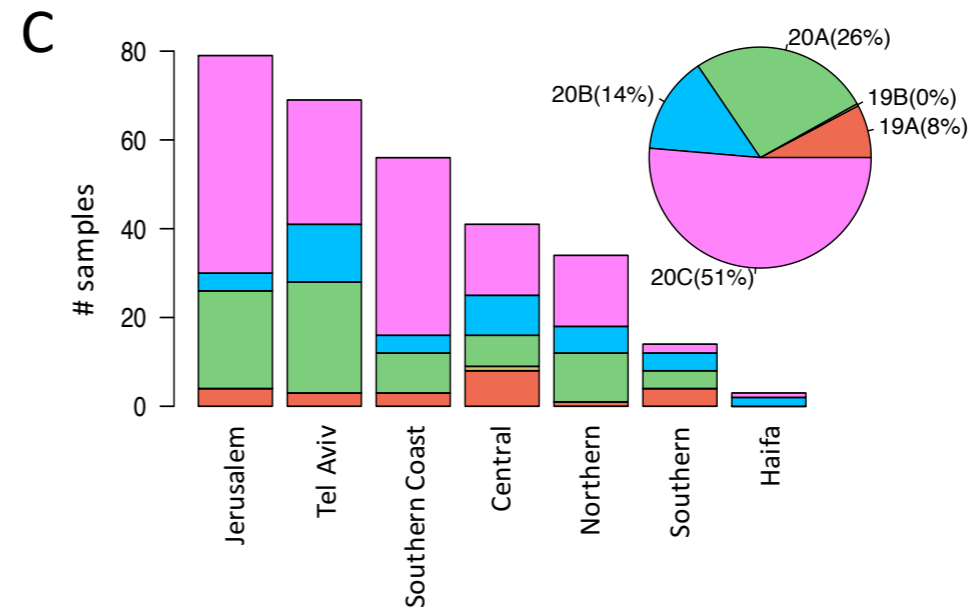

A

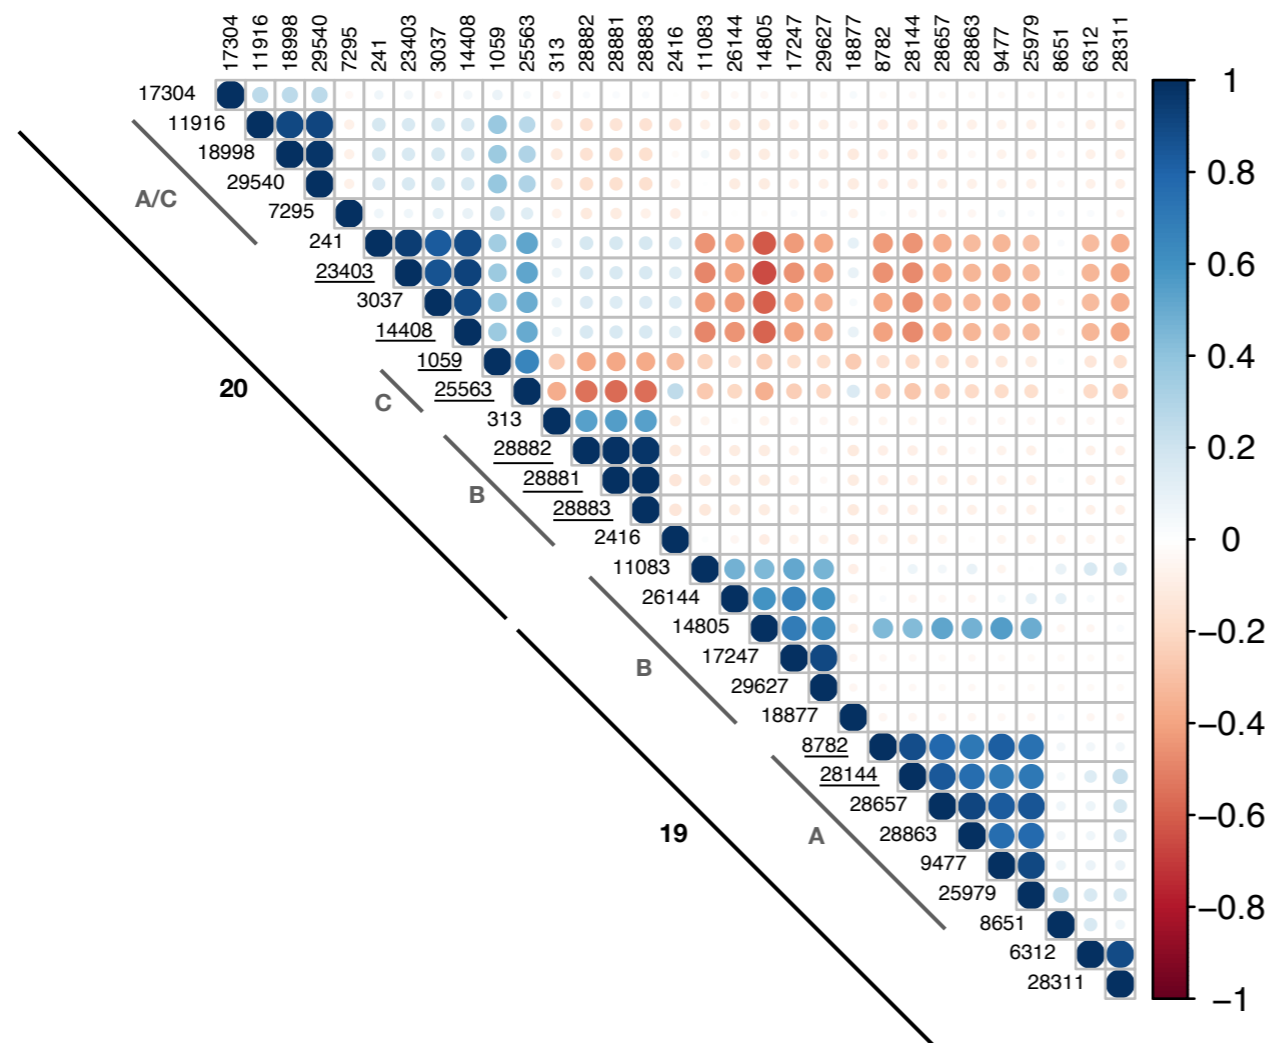

B

| position | gene  | %    | Ref | Alt | R/S | AA group                         |
|----------|-------|------|-----|-----|-----|----------------------------------|
| 241      | 5'UTR | 83.0 | c   | t   |     |                                  |
| 313      | Nsp1  | 6.5  | c   | t   | S   |                                  |
| 1059     | Nsp2  | 46.0 | c   | t   | R   | Aliphatic (I) , Hydroxylated (T) |
| 2416     | Nsp3  | 8.9  | c   | t   | S   |                                  |
| 3037     | Nsp3  | 85.1 | c   | t   | S   |                                  |
| 6312     | Nsp3  | 2.3  | c   | a   | R   | Basic (K) , Hydroxylated (T)     |
| 7295     | Nsp4  | 4.4  | g   | t   | R   | Hydroxylated (S) , Aliphatic (A) |
| 8651     | Nsp4  | 2.1  | a   | c   | R   | Aliphatic (M/L)                  |
| 8782     | Nsp4  | 3.1  | c   | t   | S   |                                  |
| 9477     | Nsp4  | 2.1  | t   | a   | R   | Aromatic (F/Y)                   |
| 11083    | Nsp6  | 7.8  | g   | t   | R   | Aromatic (F) , Aliphatic (L)     |
| 11916    | Nsp7  | 15.9 | c   | t   | R   | Aliphatic (L) , Hydroxylated (S) |
| 14408    | Nsp12 | 86.9 | c   | t   | S   |                                  |
| 14805    | Nsp12 | 5.7  | c   | t   | R   | Aliphatic (I) , Hydroxylated (T) |
| 17247    | Nsp13 | 2.9  | t   | c   | S   |                                  |
| 17304    | Nsp13 | 2.3  | c   | t   | S   |                                  |
| 18998    | Nsp14 | 14.4 | c   | t   | R   | Aliphatic (A/V)                  |
| 23403    | Spike | 85.1 | a   | g   | R   | Acidic (D) , Aliphatic (G)       |
| 25563    | Orf3a | 63.4 | g   | t   | R   | Aminic (Q) , Basic (H)           |
| 25979    | Orf3a | 2.3  | g   | t   | R   | Aliphatic (V/G)                  |
| 26144    | Orf3a | 3.9  | g   | t   |     |                                  |
| 28144    | Orf8  | 3.7  | t   | c   | R   | Hydroxylated (S) , Aliphatic (L) |
| 28311    | Nucap | 2.6  | c   | t   | R   | Aliphatic (L) , Proline (P)      |
| 28657    | Nucap | 2.6  | c   | t   | S   |                                  |
| 28863    | Nucap | 2.6  | c   | t   | R   | Aliphatic (L) , Hydroxylated (S) |
| 28881    | Nucap | 14.9 | g   | a   | R   | Basic (K/R)                      |
| 28882    | Nucap | 14.9 | g   | a   | R   | Basic (K/R)                      |
| 28883    | Nucap | 15.1 | g   | c   | R   | Basic (R) , Aliphatic (G)        |
| 29627    | Orf10 | 2.6  | c   | t   | R   | Cysteine (C) , Basic (R)         |
